# Supplementary material
Source: HighWire-hosted journal article supplement (http://www.qdcxjkg.com/highwire/filestream/114222/field_highwire_adjunct_files/0/42-6_CME.pdf)
Supplement: 42-6_CME.pdf [file 42-6_CME.pdf]

# CME Credit Application Form

## (1 CME credit)

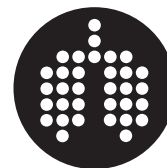

To receive CME credits, read the CME article in this issue, indicate the correct responses to the educational questions and complete the requested information. This form is also available in electronic format at [www.erj.ersjournals.com/current.dtl](http://www.erj.ersjournals.com/current.dtl). To return your application, you can either:

- ▶ use this form and return it completed to ERS Publications Office, 442 Glossop Road, Sheffield, S10 2PX, UK; fax to +44-114-2665064; or e-mail to [info@ersj.org.uk](mailto:info@ersj.org.uk)
- ▶ fill in the online form at [www.erj.ersjournals.com/current.dtl](http://www.erj.ersjournals.com/current.dtl)

Certificates will be e-mailed to the address filled in below. Please allow 4 weeks for processing.

**CME credit applications are now free of charge.**

### Applicant personal details.

ERS Membership No. (if known): ..... Date of Birth (DD/MM/YYYY): .....

Family Name: ..... First Name: .....

Mailing Address: .....

.....

Postal Code: ..... City: ..... Country: .....

Telephone: + ..... E-mail: .....

### Educational questions.

“Severely reduced diffusion capacity in idiopathic pulmonary arterial hypertension: patient characteristics and treatment responses”

For some questions more than one answer could be correct.

1. Which of the following statements is not true: a typical feature of an idiopathic PAH patient with a low  $DL_{CO}$  (<45% predicted) is:  
 Age above 60 years.  Female sex.  Former smoker.

2. Which of the following statements is true?

Treatment response and life expectancy is similar for idiopathic PAH patients with a low  $DL_{CO}$  in comparison to patients with a preserved  $DL_{CO}$ .  Treatment response and life expectancy is worse for idiopathic PAH patients with a low  $DL_{CO}$  in comparison to patients with a preserved  $DL_{CO}$ .  Treatment response and life expectancy is better for idiopathic PAH patients with a low  $DL_{CO}$  in comparison to patients with a preserved  $DL_{CO}$ .  Although treatment response is similar for idiopathic PAH with a low  $DL_{CO}$  in comparison to patients with a preserved  $DL_{CO}$ , life expectancy is better.

3.  $DL_{CO}$  can be used in the differential diagnosis of pulmonary hypertension:

To diagnose patients with pulmonary hypertension secondary to left heart failure.  To differentiate patients with idiopathic PAH from patients with chronic thromboembolic pulmonary hypertension.  To guide treatment decisions.  None of the above.
